# Supplementary material for: miR-106b-5p contributes to the lung metastasis of breast cancer via targeting CNN1 and regulating Rho/ROCK1 pathway
Source: publisher site journal article supplement (doi:10.18632/aging.102719), 2020-01-27
Supplement: Supplementary file [file aging-v12i2-102719-supplementary-material-SD1.pdf]

**SUPPLEMENTARY FIGURES**

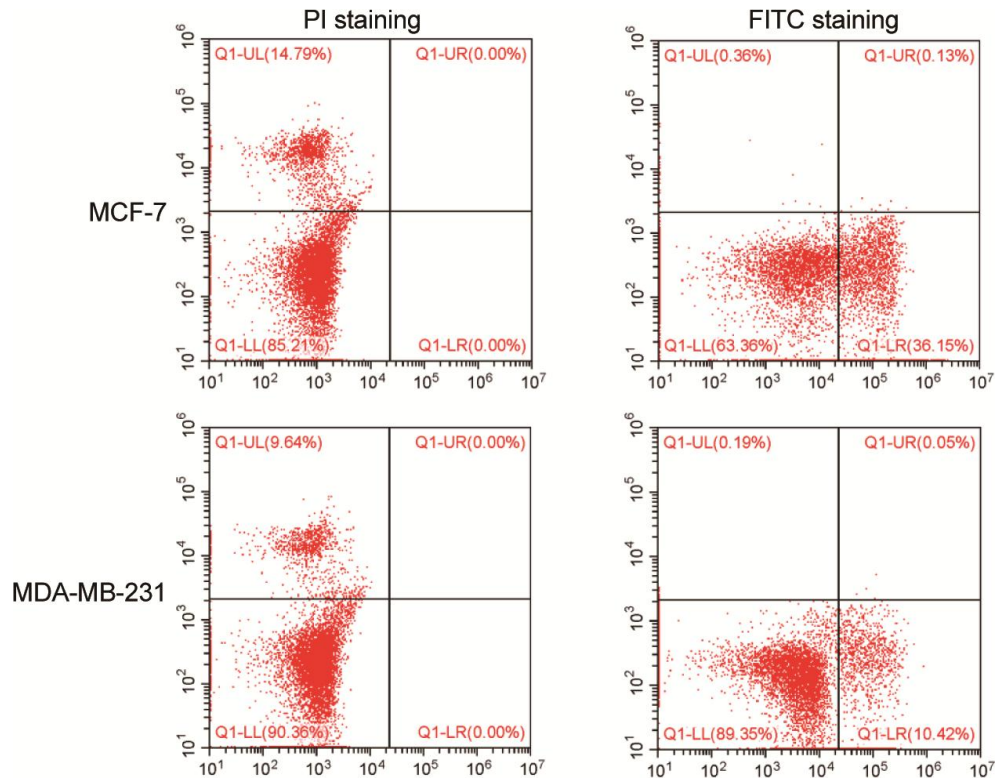

**Supplementary Figure 1. Single color staining control for flow analysis of apoptosis.**

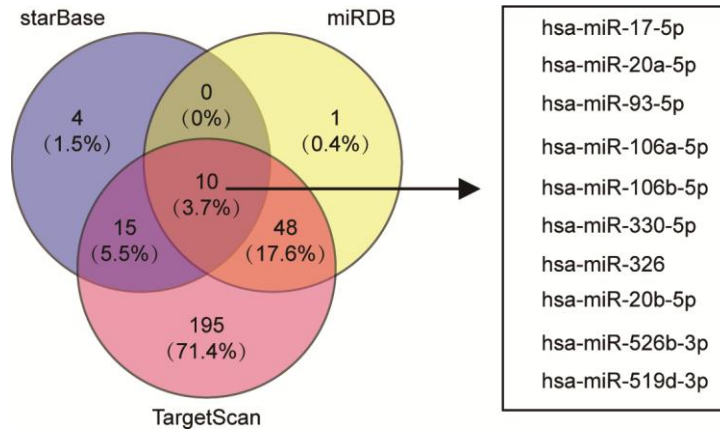

**Supplementary Figure 2. Identification of the miRNA of interest. Starbase, miRDB and TargetScan Human 7.2 algorithms were used.**
